# Supplementary material for: Cost-effectiveness of Xpert®MTB/RIF in the diagnosis of tuberculosis: pragmatic study
Source: PubMed Central journal article supplement (PMC7891564; doi:10.1590/0037-8682-0755-2020), 2021-02-10
Supplement: 1678-9849-rsbmt-54-e07552020-suppl1.pdf [file 1678-9849-rsbmt-54-e07552020-suppl1.pdf]

## Supplementary Material

### 1. Mean Cost Analysis Calculation Memory

| Xpert with subsidy in National Referral Center in State of Rio de Janeiro (n =160) |              |                  |                   |                  |
|------------------------------------------------------------------------------------|--------------|------------------|-------------------|------------------|
| Activities                                                                         | Amount       | Unit cost (US\$) | Total cost (US\$) | Mean Cost (US\$) |
| <b>Equipments</b>                                                                  |              |                  |                   | US\$ 1.23        |
| Xpert IV                                                                           | 1            | 17.000.00        | 17.000.00         | 0.89             |
| Computer                                                                           | 1            | 495.91           | 495.91            | 0.05             |
| Stable and uninterrupted electrical supply                                         | 1            | 495.91           | 495.91            | 0.05             |
| Printer                                                                            | 1            | 198.36           | 198.36            | 0.02             |
| Shipment                                                                           | 1            | 4.156.73         | 4.156.73          | 0.22             |
| <b>Human Resources</b>                                                             |              |                  |                   | US\$ 18.28       |
| Laboratory Technician                                                              | 3            | 717.42           | 2.152.26          | 13.45            |
| Administrative assistant                                                           | 1            | 772.28           | 772.28            | 4.83             |
| <b>Inputs</b>                                                                      |              |                  |                   | US\$ 16.86       |
| Cartridge                                                                          | 1            | 16.86            | 16.86             | 16.86            |
| <b>Infrastructure</b>                                                              |              |                  |                   | US\$ 1.22        |
| Light                                                                              | Monthly bill | 17.356.81        | 17.356.81         | 0.22             |
| Water                                                                              | Monthly bill | 59.509.05        | 59.509.05         | 0.74             |
| Safety                                                                             | Monthly bill | 12.382.90        | 12.382.90         | 0.15             |
| Cleaning                                                                           | Monthly bill | 8.678.40         | 8.678.40          | 0.11             |
| <b>Total</b>                                                                       |              |                  |                   | US\$ 37.59       |

Legend: Xpert: Xpert®MTB/RIF

| Xpert with subsidy in National Referral Center in State of Ceará (n=275) |              |                  |                   |                  |
|--------------------------------------------------------------------------|--------------|------------------|-------------------|------------------|
| Activities                                                               | Amount       | Unit cost (US\$) | Total cost (US\$) | Mean Cost (US\$) |
| <b>Equipments</b>                                                        |              |                  |                   | US\$ 0.71        |
| Xpert IV                                                                 | 1            | 17.000.00        | 17.000.00         | 0.52             |
| Computer                                                                 | 1            | 495.91           | 495.91            | 0.03             |
| Stable and uninterrupted electrical supply                               | 1            | 495.91           | 495.91            | 0.03             |
| Printer                                                                  | 1            | 198.36           | 198.36            | 0.01             |
| Shipment                                                                 | 1            | 4.156.73         | 4.156.73          | 0.12             |
| <b>Human Resources</b>                                                   |              |                  |                   | US\$ 11.18       |
| Laboratory Technician                                                    | 5            | 495.91           | 2.479.54          | 9.02             |
| Administrative assistant                                                 | 1            | 595.09           | 595.09            | 2.16             |
| <b>Inputs</b>                                                            |              |                  |                   | US\$ 16.86       |
| Cartridge                                                                | 1            | 16.86            | 16.86             | 16.86            |
| <b>Infrastructure</b>                                                    |              |                  |                   | US\$ 0.62        |
| Light                                                                    | Monthly bill | 50.501.58        | 50.501.58         | 0.37             |
| Water                                                                    | Monthly bill | 10.676.12        | 10.676.12         | 0.08             |
| Safety                                                                   | Monthly bill | 8.628.39         | 8.628.39          | 0.06             |
| Cleaning                                                                 | Monthly bill | 15.473.66        | 15.473.66         | 0.11             |
| <b>Total</b>                                                             |              |                  |                   | US\$ 29.37       |

Legend: Xpert: Xpert®MTB/RIF

| <b>Xpert with subsidy: total Mean Cost (US\$)</b> |                            |                            |                         |
|---------------------------------------------------|----------------------------|----------------------------|-------------------------|
| <b>Activities</b>                                 | <b>Mean Cost (US\$): A</b> | <b>Mean Cost (US\$): B</b> | <b>Mean Cost (US\$)</b> |
| <b>Equipaments</b>                                | 1.23                       | 0.71                       | <b>0.97</b>             |
| <b>Human Resources</b>                            | 18.28                      | 11.18                      | <b>14.73</b>            |
| <b>Inputs</b>                                     | 16.86                      | 16.86                      | <b>16.86</b>            |
| <b>Infrastructure</b>                             | 1.22                       | 0.62                       | <b>0.92</b>             |
| <b>Total</b>                                      | <b>37.59</b>               | <b>29.37</b>               | <b>33.48</b>            |

**Legend:** A = National Referral Centers in State of Rio de Janeiro; B = National Referral Center in State of Ceará; Xpert: Xpert®MTB/RIF

| <b>Xpert without Subsidy in National Referral Center of Rio de Janeiro (n=160)</b> |               |                         |                          |                         |
|------------------------------------------------------------------------------------|---------------|-------------------------|--------------------------|-------------------------|
| <b>Activities</b>                                                                  | <b>Amount</b> | <b>Unit cost (US\$)</b> | <b>Total cost (US\$)</b> | <b>Mean Cost (US\$)</b> |
| <b>Equipaments</b>                                                                 |               |                         |                          | US\$ 7.73               |
| Xpert IV                                                                           | 1             | 139.463.41              | 139.463.41               | 7.26                    |
| Computer                                                                           | 1             | 1.487.73                | 1.487.73                 | 0.15                    |
| Stable and uninterrupted electrical supply                                         | 1             | 743.86                  | 743.86                   | 0.08                    |
| Printer                                                                            | 1             | 198.36                  | 198.36                   | 0.02                    |
| Shipment                                                                           | 1             | 4.156.73                | 4.156.73                 | 0.22                    |
| <b>Human Resources</b>                                                             |               |                         |                          | US\$ 18.28              |
| Laboratory Technician                                                              | 3             | 717.42                  | 2.152.26                 | 13.45                   |
| Administrative assistant                                                           | 1             | 772.28                  | 772.28                   | 4.83                    |
| <b>Inputs</b>                                                                      |               |                         |                          | US\$ 153.47             |
| Cartridge                                                                          | 1             | 153.47                  | 153.47                   | 153.47                  |
| <b>Infrastructure</b>                                                              |               |                         |                          | US\$ 1.22               |
| Light                                                                              | Monthly bill  | 17.356.81               | 17.356.81                | 0.22                    |
| Water                                                                              | Monthly bill  | 59.509.05               | 59.509.05                | 0.74                    |
| Safety                                                                             | Monthly bill  | 12.382.90               | 12.382.90                | 0.15                    |
| Cleaning                                                                           | Monthly bill  | 8.678.40                | 8.678.40                 | 0.11                    |
| <b>Total</b>                                                                       |               |                         |                          | <b>US\$ 180.71</b>      |

**Legend:** Xpert: Xpert®MTB/RIF

| <b>Xpert without Subsidy in National Referral Center in State of Ceará (n=275)</b> |               |                         |                          |                         |
|------------------------------------------------------------------------------------|---------------|-------------------------|--------------------------|-------------------------|
| <b>Activities</b>                                                                  | <b>Amount</b> | <b>Unit cost (US\$)</b> | <b>Total cost (US\$)</b> | <b>Mean Cost (US\$)</b> |
| <b>Equipaments</b>                                                                 |               |                         |                          | <b>US\$ 4.50</b>        |
| Xpert IV                                                                           | 1             | 139.463.41              | 139.463.41               | 4.23                    |
| Computer                                                                           | 1             | 1.487.73                | 1.487.73                 | 0.09                    |
| Stable and uninterrupted electrical supply                                         | 1             | 743.86                  | 743.86                   | 0.05                    |
| Printer                                                                            | 1             | 198.36                  | 198.36                   | 0.01                    |
| Shipment                                                                           | 1             | 4.156.73                | 4.156.73                 | 0.13                    |
| <b>Human Resources</b>                                                             |               |                         |                          | <b>US\$ 11.18</b>       |
| Laboratory Technician                                                              | 5             | 495.91                  | 2.479.54                 | 9.02                    |
| Administrative assistant                                                           | 1             | 595.09                  | 595.09                   | 2.16                    |
| <b>Inputs</b>                                                                      |               |                         |                          | <b>US\$ 153.47</b>      |
| Cartridge                                                                          | 1             | 153.47                  | 153.47                   | 153.47                  |
| <b>Infrastructure</b>                                                              |               |                         |                          | <b>US\$ 0.62</b>        |
| Light                                                                              | Monthly bill  | 50.501.58               | 50.501.58                | 0.37                    |
| Water                                                                              | Monthly bill  | 10.676.12               | 10.676.12                | 0.08                    |
| Safety                                                                             | Monthly bill  | 8.628.39                | 8.628.39                 | 0.06                    |
| Cleaning                                                                           | Monthly bill  | 15.473.66               | 15.473.66                | 0.11                    |
| <b>Total</b>                                                                       |               |                         |                          | <b>US\$ 169.77</b>      |

**Legend:** Xpert: Xpert®MTB/RIF

| <b>Xpert without Subsidy: total Mean Cost (US\$)</b> |                            |                            |                         |
|------------------------------------------------------|----------------------------|----------------------------|-------------------------|
| <b>Activities</b>                                    | <b>Mean Cost (US\$): A</b> | <b>Mean Cost (US\$): B</b> | <b>Mean Cost (US\$)</b> |
| <b>Equipaments</b>                                   | 7.73                       | 4.50                       | <b>6.11</b>             |
| <b>Human Resources</b>                               | 18.28                      | 11.18                      | <b>14.74</b>            |
| <b>Inputs</b>                                        | 153.47                     | 153.47                     | <b>153.47</b>           |
| <b>Infrastructure</b>                                | 1.22                       | 0.62                       | <b>0.92</b>             |
| <b>Total</b>                                         | 180.71                     | 169.77                     | <b>175.24</b>           |

**Legend:** A = National Referral Center in State of Rio de Janeiro; B = National Referral Center in State of Ceará; Xpert: Xpert®MTB/RIF

| <b>DST-MGIT in National Referral Center in State of Rio de Janeiro (n=325)</b> |               |                         |                          |                         |
|--------------------------------------------------------------------------------|---------------|-------------------------|--------------------------|-------------------------|
| <b>Activities</b>                                                              | <b>Amount</b> | <b>Unit cost (US\$)</b> | <b>Total cost (US\$)</b> | <b>Mean Cost (US\$)</b> |
| <b>Equipaments</b>                                                             |               |                         |                          | US\$ 0.92               |
| Biological Safety Cabin                                                        | 1             | 7.438.63                | 7.438.63                 | 0.10                    |
| Centrifuge                                                                     | 1             | 981.90                  | 981.90                   | 0.01                    |
| Shaker                                                                         | 1             | 210.36                  | 210.36                   | 0.00                    |
| Bactec MGIT 960                                                                | 1             | 61.988.59               | 61.988.59                | 0.79                    |
| Pipettor                                                                       | 1             | 47.61                   | 47.61                    | 0.00                    |
| Telefone                                                                       | 1             | 14.33                   | 14.33                    | 0.00                    |
| Sink                                                                           | 1             | 99.18                   | 99.18                    | 0.00                    |
| Hand sanitizer                                                                 | 1             | 28.76                   | 28.76                    | 0.00                    |
| Garbage basket                                                                 | 1             | 9.87                    | 9.87                     | 0.00                    |
| Computer                                                                       | 1             | 743.86                  | 743.86                   | 0.01                    |
| Stopwatch                                                                      | 1             | 10.90                   | 10.90                    | 0.00                    |
| Metal tray                                                                     | 1             | 24.80                   | 24.80                    | 0.00                    |
| Centrifuge tube rack 30 mL or 50 mL                                            | 1             | 13.89                   | 13.89                    | 0.00                    |
| Pasteur pipettes (2mL and 5mL)                                                 | 3             | 0.31                    | 0.94                     | 0.00                    |
| Glass or metal container for material disposal                                 | 1             | 0.50                    | 0.50                     | 0.00                    |
| Polypropylene tray for incubating seeded tubes                                 | 1             | 34.71                   | 34.71                    | 0.00                    |
| <b>Human Resources</b>                                                         |               |                         |                          | US\$ 16.95              |
| Biochemical                                                                    | 1             | 1.173.63                | 1.173.63                 | 3.61                    |
| Laboratory technician                                                          | 5             | 717.42                  | 3.587.11                 | 10.84                   |
| Administrative agent                                                           | 1             | 772.28                  | 772.28                   | 2.37                    |
| Safety                                                                         | Monthly bill  | 12.382.90               | 12.382.90                | 0.08                    |
| Cleaning                                                                       | Monthly bill  | 8.678.40                | 8.678.40                 | 0.05                    |
| <b>Inputs</b>                                                                  |               |                         |                          | US\$ 54.01              |
| 4% NaOH solution                                                               | 5.00          | 0.00                    | 0.01                     | 0.01                    |
| Neutralizing Solution                                                          | 5.00          | 0.50                    | 2.48                     | 2.48                    |
| 70% Alcohol Solution (mL)                                                      | 5.00          | 0.00                    | 0.01                     | 0.01                    |
| 5% Phenol solution.                                                            | 5.00          | 0.50                    | 2.48                     | 2.48                    |
| Phosphate Buffer Solution pH 6.8                                               | 5.00          | 0.08                    | 0.40                     | 0.40                    |
| Sterile distilled water                                                        | 5.00          | 2.95                    | 14.75                    | 14.75                   |
| Sterile Saline Solution                                                        | 5.00          | 0.02                    | 0.10                     | 0.10                    |
| 2.9% Sodium Citrate Solution                                                   | 5.00          | 0.50                    | 2.48                     | 2.48                    |
| Absorbent paper (roll)                                                         | 0.05          | 1.26                    | 0.06                     | 0.06                    |
| Polypropylene centrifuge tubes                                                 | 1.00          | 0.50                    | 0.50                     | 0.50                    |
| Sterile gauze in pieces (piece)                                                | 2.00          | 0.00                    | 0.00                     | 0.00                    |
| 5% Phenol Solution Container                                                   | 1.00          | 0.50                    | 0.50                     | 0.50                    |
| Plastic container for the material to be autoclaved and discarded.             | 1.00          | 0.50                    | 0.50                     | 0.50                    |
| Tubes with Liquid Medium - 7H9 + Antibiotic + Supplement (udd)                 | 4.00          | 7.27                    | 29.06                    | 29.06                   |
| Smear slides (unit)                                                            | 2.00          | 0.04                    | 0.07                     | 0.07                    |
| Autoclavable plastic bag for disposal                                          | 0.03          | 0.50                    | 0.02                     | 0.02                    |
| Mask                                                                           | 0.03          | 3.02                    | 0.10                     | 0.10                    |
| Disposable apron                                                               | 0.17          | 0.05                    | 0.01                     | 0.01                    |
| Disposable Glove                                                               | 0.17          | 0.01                    | 0.00                     | 0.00                    |
| PH tape and Petri dish or small test tube                                      | 1.00          | 0.50                    | 0.50                     | 0.50                    |

Continued

|                       |              |           |           |                   |
|-----------------------|--------------|-----------|-----------|-------------------|
| <b>Infrastructure</b> |              |           |           | US\$ 0.62         |
| Telefone              | Monthly bill | 24.299.53 | 24.299.53 | 0.15              |
| Light                 | Monthly bill | 17.356.81 | 17.356.81 | 0.11              |
| Water                 | Monthly bill | 59.509.05 | 59.509.05 | 0.37              |
| <b>Total</b>          |              |           |           | <b>US\$ 72.50</b> |

**Legend:** DST: Drug Susceptibility Test; MGIT: Bactec<sup>TM</sup>MGIT<sup>TM</sup>960 System; Xpert: Xpert<sup>®</sup>MTB/RIF

| <b>DST-MGIT in National Referral Center in State of Ceará (n=600)</b> |               |                         |                          |                         |
|-----------------------------------------------------------------------|---------------|-------------------------|--------------------------|-------------------------|
| <b>Activities</b>                                                     | <b>Amount</b> | <b>Unit cost (US\$)</b> | <b>Total cost (US\$)</b> | <b>Mean Cost (US\$)</b> |
| <b>Equipaments</b>                                                    |               |                         |                          | US\$ 0.50               |
| Biological Safety Cabin                                               | 1             | 7.438.63                | 7.438.63                 | 0.05                    |
| Centrifuge                                                            | 1             | 981.90                  | 981.90                   | 0.01                    |
| Shaker                                                                | 1             | 210.36                  | 210.36                   | 0.00                    |
| Bactec MGIT 960                                                       | 1             | 61.988.59               | 61.988.59                | 0.43                    |
| Pipettor                                                              | 1             | 47.61                   | 47.61                    | 0.00                    |
| Telefone                                                              | 1             | 14.33                   | 14.33                    | 0.00                    |
| Sink                                                                  | 1             | 99.18                   | 99.18                    | 0.00                    |
| Hand sanitizer                                                        | 1             | 28.76                   | 28.76                    | 0.00                    |
| Garbage basket                                                        | 1             | 9.87                    | 9.87                     | 0.00                    |
| Computer                                                              | 1             | 743.86                  | 743.86                   | 0.01                    |
| Stopwatch                                                             | 1             | 10.90                   | 10.90                    | 0.00                    |
| Metal tray                                                            | 1             | 24.80                   | 24.80                    | 0.00                    |
| Centrifuge tube rack 30 mL or 50 mL                                   | 1             | 13.89                   | 13.89                    | 0.00                    |
| Pasteur pipettes (2mL and 5mL)                                        | 3             | 0.31                    | 0.94                     | 0.00                    |
| Glass or metal container for material disposal                        | 1             | 0.50                    | 0.50                     | 0.00                    |
| Polypropylene tray for incubating seeded tubes                        | 1             | 34.71                   | 34.71                    | 0.00                    |
| <b>Human Resources</b>                                                |               |                         |                          | US\$ 7.02               |
| Biochemical                                                           | 1             | 991.82                  | 991.82                   | 1.82                    |
| Laboratory technician                                                 | 5             | 495.91                  | 2.479.54                 | 4.13                    |
| Administrative agent                                                  | 1             | 595.09                  | 595.09                   | 0.99                    |
| Safety                                                                | Monthly bill  | 8.628.39                | 8.628.39                 | 0.03                    |
| Cleaning                                                              | Monthly bill  | 15.473.66               | 15.473.66                | 0.05                    |
| <b>Inputs</b>                                                         |               |                         |                          | US\$ 54.01              |
| 4% NaOH solution                                                      | 5.00          | 0.00                    | 0.01                     | 0.01                    |
| Neutralizing Solution                                                 | 5.00          | 0.50                    | 2.48                     | 2.48                    |
| 70% Alcohol Solution (mL)                                             | 5.00          | 0.00                    | 0.01                     | 0.01                    |
| 5% Phenol solution.                                                   | 5.00          | 0.50                    | 2.48                     | 2.48                    |
| Phosphate Buffer Solution pH 6.8                                      | 5.00          | 0.08                    | 0.40                     | 0.40                    |
| Sterile distilled water                                               | 5.00          | 2.95                    | 14.75                    | 14.75                   |
| Sterile Saline Solution                                               | 5.00          | 0.02                    | 0.10                     | 0.10                    |
| 2.9% Sodium Citrate Solution                                          | 5.00          | 0.50                    | 2.48                     | 2.48                    |
| Absorbent paper (roll)                                                | 0.05          | 1.26                    | 0.06                     | 0.06                    |
| Polypropylene centrifuge tubes                                        | 1.00          | 0.50                    | 0.50                     | 0.50                    |
| Sterile gauze in pieces (piece)                                       | 2.00          | 0.00                    | 0.00                     | 0.00                    |
| 5% Phenol Solution Container                                          | 1.00          | 0.50                    | 0.50                     | 0.50                    |



|                                                                    |              |           |           |                   |
|--------------------------------------------------------------------|--------------|-----------|-----------|-------------------|
| Plastic container for the material to be autoclaved and discarded. | 1.00         | 0.50      | 0.50      | 0.50              |
| Tubes with Liquid Medium - 7H9 + Antibiotic + Supplement (udd)     | 4.00         | 7.27      | 29.06     | 29.06             |
| Smear slides (unit)                                                | 2.00         | 0.04      | 0.07      | 0.07              |
| Autoclavable plastic bag for disposal                              | 0.03         | 0.50      | 0.02      | 0.02              |
| Mask                                                               | 0.03         | 3.02      | 0.10      | 0.10              |
| Disposable apron                                                   | 0.17         | 0.05      | 0.01      | 0.01              |
| Disposable Glove                                                   | 0.17         | 0.01      | 0.00      | 0.00              |
| PH tape and Petri dish or small test tube                          | 1.00         | 0.50      | 0.50      | 0.50              |
| <b>Infrastructure</b>                                              |              |           |           | <b>US\$ 0.23</b>  |
| Telefone                                                           | Monthly bill | 1.787.35  | 1.787.35  | 0.02              |
| Light                                                              | Monthly bill | 50.501.58 | 50.501.58 | 0.16              |
| Water                                                              | Monthly bill | 10.676.12 | 10.676.12 | 0.05              |
| <b>Total</b>                                                       |              |           |           | <b>US\$ 61.76</b> |

**Legend:** DST: Drug Susceptibility Test; MGIT: Bactec<sup>TM</sup>MGIT<sup>TM</sup>960 System; Xpert: Xpert<sup>®</sup>MTB/RIF

| Activities             | DST-MGIT: total Mean Cost (US\$) |                     |                  |
|------------------------|----------------------------------|---------------------|------------------|
|                        | Mean Cost (US\$): A              | Mean Cost (US\$): B | Mean Cost (US\$) |
| <b>Equipaments</b>     | 0.92                             | 0.50                | <b>0.71</b>      |
| <b>Human Resources</b> | 16.95                            | 7.02                | <b>11.99</b>     |
| <b>Inputs</b>          | 54.01                            | 54.01               | <b>54.01</b>     |
| <b>Infrastructure</b>  | 0.62                             | 0.23                | <b>0.42</b>      |
| <b>Total</b>           | 72.50                            | 61.76               | <b>67.13</b>     |

**Legend:** A = National Referral Center in State of Rio de Janeiro; B = National Referral Center in states of Ceará; DST: Drug Susceptibility Test; MGIT: Bactec<sup>TM</sup>MGIT<sup>TM</sup>960 System; Xpert: Xpert<sup>®</sup>MTB/RIF

## 2. Cost Effectiveness Analysis Calculation Memory

### Xpert and DST-MGIT

#### Arm1\* Negativity\_6°month\_lab\_and\_clinic Cross tabulation

| Arm 1    | Negativity_6°month_lab_and_clinic |          | Total exams | Effectiveness |
|----------|-----------------------------------|----------|-------------|---------------|
|          | Negative                          | Positive |             |               |
| Xpert    | 16                                | 1        | 17          | = 94.12%      |
| DST-MGIT | 29                                | 7        | 36          | = 80.55%      |
| Total    | 45                                | 8        | 53          |               |

**Effectiveness** = Tt exams / Tt negativity 6° month

**Xpert** = 17/16 = 94.12%

**DST-MGIT** = 36/29 = 80.55%

**Incremental Effectiveness** = Effectiveness Xpert – Effectiveness DST-MGIT

Incremental Effectiveness = [94.12] – [80.55] = 13.57

#### Cost effectiveness and Incremental Cost-Effectiveness Ratio (ICER) – (Manuscript Table 2)

| Diagnostic Test       | Mean Cost (US\$) | Effectiveness (negative culture and clinical improvement) | Cost Effectiveness (US\$) | Incremental Effectiveness | Incremental Cost (US\$) | ICER (US\$) |
|-----------------------|------------------|-----------------------------------------------------------|---------------------------|---------------------------|-------------------------|-------------|
| DST-MGIT              | 67.13            | 80.55                                                     | 0.83                      | -                         | -                       | -           |
| Xpert with subsidy    | 33.48            | 94.12                                                     | 0.36                      | 13.57                     | dominat                 | dominat     |
| Xpert without subsidy | 175.24           | 94.12                                                     | 1.86                      | 13.57                     | 108.11                  | 7.97        |

**Legend:** DST: Drug Susceptibility Test; MGIT: Bactec™MGIT™960 System; Xpert: Xpert®MTB/RIF

**Cost Effectiveness** = Mean Cost / Effectiveness

**Incremental Effectiveness** = Effectiveness Xpert – Effectiveness DST-MGIT

**Incremental Cost** = Mean Cost Xpert – Mean Cost DST-MGIT

**ICER Cost** = (Mean Cost Xpert – Mean Cost DST-MGIT) / Incremental Effectiveness

### 3. Sensitivity Analysis Calculation Memory (Manuscript Table 5)

| Xpert With Subsidies |          |                                                  |
|----------------------|----------|--------------------------------------------------|
|                      | Xpert    | Xpert (variation) and DST-MGIT (fixed) 80.55%    |
| Maximum              | 99.00    | (Maximum - Average) + Incremental effectiveness  |
| Average              | 94.12    | Incremental effectiveness (Manuscript Table 2)   |
| Minimum              | 71.00    | (Average - Minimum) - Incremental effectiveness  |
|                      | DST-MGIT | DST-MGIT (variation) and Xpert (fixed) 94.12%    |
| Maximum              | 91.00    | (Maximum - Average) + Incremental effectiveness  |
| Average              | 80.55    | Incremental effectiveness - (Manuscript Table 2) |
| Minimum              | 65.00    | -(Average - Minimum) - Incremental effectiveness |

| Xpert Without subsidy                 | Incremental cost Xpert without subsidy less DST-MGIT | Test's effectiveness and Standard Desviation | ICER                                                                              |
|---------------------------------------|------------------------------------------------------|----------------------------------------------|-----------------------------------------------------------------------------------|
| Mean Cost (US\$) (Manuscript Table 2) | Incremental Cost (US\$) (Manuscript Table 2)         | Maximum 99.00                                | Incremental cost/(Maximum - Average) + Incremental effectiveness (xpert)          |
|                                       |                                                      | Average 94.12                                | Xpert (variation) and DST-MGIT (fixed) 80.55%<br>ICER (US\$) (Manuscript Table 2) |
|                                       |                                                      | Minimum 71.00                                | Incremental cost/(Average - Minimum) + Incremental effectiveness (xpert)          |
|                                       |                                                      | Maximum 91.00                                | Incremental cost/(Maximum - Average) + Incremental effectiveness (DST-MGIT)       |
|                                       |                                                      | Average 80.55                                | DST-MGIT (variation) and Xpert (fixed) 94.12%<br>ICER (US\$) (Manuscript Table 2) |
|                                       |                                                      | Minimum 65.00                                | Incremental cost/(Average - Minimum) + Incremental effectiveness (DST-MGIT)       |

**Legend:** DST: Drug Susceptibility Test; MGIT: Bactec™MGIT™960 System; Xpert: Xpert®MTB/RIF; ICER: Incremental Cost-Effectiveness Ratio
